# Supplementary material for: Post-earthquake Zika virus surge: Disaster and public health threat amid climatic conduciveness
Source: PubMed Central journal article supplement (PMC5684400; doi:10.1038/s41598-017-15706-w), 2017-11-13
Supplement: 41598_2017_15706_MOESM1_ESM.pdf [file 41598_2017_15706_MOESM1_ESM.pdf]

1 **Post-earthquake Zika virus surge: Disaster and public health threat amid climatic conduciveness**

2

3 Miguel Reina Ortiz<sup>1,2</sup>, Nicole K. Le<sup>3</sup>, Vinita Sharma<sup>4</sup>, Ismael Hoare<sup>1</sup>, Edy Quizhpe<sup>5,6</sup>, Enrique Teran<sup>6</sup>,

4 Eknath Naik<sup>7</sup>, Hamisu M. Salihu<sup>8</sup> & Ricardo Izurieta<sup>1,\*</sup>

5

6 <sup>1</sup> Department of Global Health, College of Public Health, University of South Florida, Tampa, FL, USA.

7 <sup>2</sup> Fundación Raíces. Esmeraldas, Ecuador.

8 <sup>3</sup> Morsani College of Medicine, University of South Florida, Tampa, FL, USA.

9 <sup>4</sup> Department of Community and Family Health, College of Public Health, University of South Florida,  
10 Tampa, FL, USA.

11 <sup>5</sup> Ministerio de Salud Pública del Ecuador, Quito, Ecuador.

12 <sup>6</sup> Colegio de Ciencias de la Salud, Universidad San Francisco de Quito, Quito, Ecuador

13 <sup>7</sup> Emergency Department, James A Haley VA Hospital, Tampa, FL, USA.

14 <sup>8</sup> Department of Family and Community Medicine, Baylor College of Medicine, Houston, TX.

15

16 \* Correspondence to rizurieta@health.usf.edu

17

18

19

1 **Supplementary materials**

2 **Supplementary Table S1**

3 **Cumulative autochthonous Zika cases by Earthquake Impact Group and by**

4 **Epidemiological Week.**

5

|                   | Earthquake Impact Group |                   |
|-------------------|-------------------------|-------------------|
|                   | Mildly affected         | Severely affected |
| caZIKV E. Week 3  | 7                       | 6                 |
| caZIKV E. Week 4  | 11                      | 14                |
| caZIKV E. Week 5  | 13                      | 21                |
| caZIKV E. Week 6  | 14                      | 23                |
| caZIKV E. Week 7  | 16                      | 24                |
| caZIKV E. Week 8  | 20                      | 29                |
| caZIKV E. Week 9  | 20                      | 33                |
| caZIKV E. Week 10 | 21                      | 34                |
| caZIKV E. Week 11 | 26                      | 37                |
| caZIKV E. Week 12 | 31                      | 38                |
| caZIKV E. Week 13 | 31                      | 40                |
| caZIKV E. Week 14 | 32                      | 40                |
| caZIKV E. Week 15 | 34                      | 41                |
| caZIKV E. Week 16 | 34                      | 43                |
| caZIKV E. Week 17 | 35                      | 44                |
| caZIKV E. Week 18 | 35                      | 54                |
| caZIKV E. Week 19 | 35                      | 79                |
| caZIKV E. Week 20 | 35                      | 108               |
| caZIKV E. Week 21 | 38                      | 147               |
| caZIKV E. Week 22 | 40                      | 156               |
| caZIKV E. Week 23 | 42                      | 210               |
| caZIKV E. Week 24 | 49                      | 515               |
| caZIKV E. Week 25 | 49                      | 586               |
| caZIKV E. Week 26 | 53                      | 780               |
| caZIKV E. Week 27 | 55                      | 1026              |
| caZIKV E. Week 28 | 59                      | 1256              |
| caZIKV E. Week 29 | 76                      | 1405              |
| caZIKV E. Week 30 | 96                      | 1540              |
| caZIKV E. Week 31 | 107                     | 1669              |

|                   |     |      |
|-------------------|-----|------|
| caZIKV E. Week 32 | 127 | 1730 |
| caZIKV E. Week 33 | 129 | 1817 |
| caZIKV E. Week 34 | 131 | 1888 |
| caZIKV E. Week 35 | 138 | 1931 |
| caZIKV E. Week 36 | 139 | 1964 |

1 caZIKV = Cumulative Autochthonous Zika virus cases  
2
